# Supplementary material
Source: publisher site journal article supplement (https://www.dovepress.com/article/248710)
Supplement: Supplementary file 1 [file get_supplementary_file.php]

|  | **CG equation** | | | | | | **FAS equation** | | | | | **CKD-EPI equation** | | | | | | | |
| --- | --- | --- | --- | --- | --- | --- | --- | --- | --- | --- | --- | --- | --- | --- | --- | --- | --- | --- | --- |
| Classification | **I** | **II** | | **III** | | **IV** | **I** | **II** | **III** | | **IV** | | **I** | | **II** | | **III** | | **IV** |
| n(%) | 380(27.9) | 715(52.5) | | 246(18.1) | | 21(1.5) | 338(24.8) | 737(54.1) | 267(19.6) | | 20(1.5) | | 458(33.6) | | 717(52.6) | | 168(12.3 | | 19(1.4) |
| Age(y) | 60(53.25;64) | 67(62;71) | | 72(68;76) | | 70(65;77) | 61(54;65) | 66(60;71) | 71(66;75) | | 70(65.50;77.50) | | 62(57;67) | | 67(61;72) | | 69(65;75) | | 70(65;76) |
| Female (n, %) | 101(26.6) | 152(21.3) | | 45(18.3) | | 5(23.8) | 94(27.8) | 163(22.1) | 41(15.4) | | 5(25.0) | | 157(34.3) | | 114(15.9) | | 27(16.1) | | 5(26.3) |
| Weight (kg) | 73(65;80) | 69(61;75) | | 68(60;74) | | 64(57;72) | 65(60(;73) | 70(62;76) | 73(68;80) | | 68(58;73) | | 64(58;70) | | 72(65;78) | | 74(67;80) | | 68(57;73) |
| Height (cm) | 168(160;172) | 168(161;171) | | 168(162;171) | | 168(158;173) | 165(159.75;170) | 168(161.50;172.00) | 170(165;173) | | 168(160.50;173.00) | | 164(158;170) | | 169(164:173) | | 170(165;173) | | 168(160;173) |
| BMI (kg/m2) | 25.95(24.22;28.08) | 24.80(22.86;26.78) | | 23.95(22.03;25.82) | | 23.53(22.64;25.92) | 24.24(22.31;26.38) | 25.06(22.96;26.99) | 25.61(23.78(27.46) | | 23.69(22.76;26.06) | | 24.09(22.15;25.97) | | 25.35(23.51;27.32) | | 25.74(23.74;27.46) | | 23.53(22.68;26.06) |
| BAS (m2) | 1.81(1.70;1.93) | 1.77(1.65;1.86) | | 1.75(1.63;1.85) | | 1.73(1.56;1.84) | 1.72(1.61;1.81) | 1.79(1.67;1.88) | 1.84(1.74(1.93) | | 1.79((1.60;1.86) | | 1.69(1.59;1.79) | | 1.83(1.72;1.90) | | 1.84(1.74;1.94) | | 1.79(1.58;1.85) |
| Smoking (n, %) | 146(38.4) | 269(37.6) | | 95(38.6) | | 12(57.1) | 129(38.2) | 271(36.8) | 112(41.9) | | 10(50.0) | | 153(33.4) | | 293(40.9) | | 66(39.3) | | 10(52.6) |
| Diabetes (n, %) | 135(35.5) | 219(30.6) | | 76(30.9) | | 13(61.9) | 108(32.0) | 238(32.3) | 84(31.5) | | 13(65.0) | | 142(31.0) | | 233(32.5) | | 55(32.7) | | 13(68.4) |
| Hypertension (n, %) | 236(62.1) | 515(72.0) | | 186(75.6) | | 18(85.7) | 194(57.4) | 527(71.5) | 218(81.6) | | 16(80.0) | | 278(60.7) | | 522(72.8) | | 139(82.7) | | 16(84.2) |
| Preoperative Scr(μmol/l) | 63.10(55.70;69.88) | 79.20(70.90;87.20) | | 104.95(93.10;121.35) | | 210.30(192.80;321.65) | 54.20(61.20;67.63) | 78.30(70.90;85.70) | 105.20(95.10;120.70) | | 209.40(192.50;324.63) | | 63.95(56.78;70.33) | | 81.80(73.85;90.15) | | 116.10(105.33;130.30) | | 210.30(193.40;327.60) |
| Cerebrovascular disease | | | | | | | | | | | | | | | | | | | |
| Lacunar infarction (n, %) | 30(7.9) | | 115(16.1) | | 58(23.6) | 1(4.8) | 28(8.3) | 115(15.6) | | 60(22.5) | 1(5.0) | 41(9.0) | | 125(17.4) | | 37(22.0) | | 1(5.3) | |
| Cerebral infarction (n, %) | 12(3.2) | | 36(5.0) | | 16(6.5 | 1(4.8) | 11(3.3) | 33(4.5) | | 20(7.5) | 1(5.0) | 18(3.9) | | 33(4.6) | | 13(7.7) | | 1(5.3) | |
| COPD (n, %) | 5(1.3) | | 14(2.0) | | 6(2.4) | 1(4.8) | 6(1.8) | 13(1.8) | | 6(2.2) | 1(5.0) | 7(1.5) | | 14(2.0) | | 4(2.4) | | 1(5.3) | |
| Peripheral vascular disease (n, %) | 5(1.3) | | 12(1.7) | | 9(3.7) | 1(4.8) | 7(2.1) | 8(1.1) | | 12(4.5) | 0(0.0) | 7(1.5) | | 11(1.5) | | 9(5.4) | | 0(0.0) | |
| Previous PCI (n, %) | 18(4.7) | | 23(3.2) | | 6(2.4) | 1(4.8) | 13(3.8) | 25(3.4) | | 9(3.4) | 1(5.0) | 18(3.9) | | 25(3.5) | | 4(2.4) | | 1(5.3) | |
| Atrial flutter and fibrillation (n, %) | 6(1.6) | | 16(2.2) | | 8(3.3) | 1(4.8) | 2(0.6) | 20(2.7) | | 8(3.0) | 1(5.0) | 4(0.9) | | 20(2.8) | | 6(3.6) | | 1(5.3) | |
| Pulmonary hypertension | | | | | | |  | | | | |
| Moderate (n, %) | 31(8.2) | | 62(8.7) | | 16(6.5) | 3(14.3) | 42(12.4) | 49(6.6) | | 18(6.7) | 3(15.0) | 50(10.9) | | 46(6.4) | | 13(7.7) | | 3(15.8) | |
| Severe (n, %) | 0(0.0) | | 1(0.1) | | 0(0.0) | 0(0.0) | 0(0.0) | 1(0.1) | | 0(0.0) | 0(0.0) | 1(0.2) | | 0(0.0) | | 0(0.0) | | 0(0.0) | |
| Type of CAD | | | | | | |  | | | | |
| MI (n, %) | 45(11.8) | | 71(9.9) | | 26(10.6) | 5(23.8) | 47(13.9) | 71(9.6) | | 25(9.4) | 4(20.0) | 63(13.8) | | 62(8.6) | | 18(10.7) | | 4(21.1) | |
| Unstable angina (n, %) | 230(60.5) | | 445(62.2) | | 152(61.8) | 12(57.1) | 194(47.4) | 463(62.8) | | 170(63.7) | 12(60.0) | 266(58.1) | | 458(63.9) | | 104(61.9) | | 11(57.9) | |
| Number of diseased vessels (n) | 3(3;3) | | 3(3;3) | | 3(3;3) | 3(3;3) | 3(3;3) | 3(3;3) | | 3(3;3) | 3(3;3) | 3(3;3) | | 3(3;3) | | 3(3;3) | | 3(3;3) | |
| Three-vessel disease (n, %) | 317(83.4) | | 642(89.8) | | 220(89.4) | 19(90.5) | 284(84.0) | 657(89.1) | | 239(89.5) | 18(90.0) | 388(84.7) | | 642(89.5) | | 151(89.9) | | 17(89.5) | |
| NYHA | | | | | | |  | | | | |
| I (n, %) | 51(13.4) | | 69(9.7) | | 16(6.5) | 0(0.0) | 46(13.6) | 70(9.5) | | 20(7.5) | 0(0.0) | 60(13.1) | | 61(8.5) | | 15(8.9) | | 0(0.0) | |
| II (n, %) | 258(67.9) | | 504(70.5) | | 162(65.9) | 11(52.4) | 229(67.8) | 519(70.4) | | 177(66.3) | 10(50.0) | 304(66.4) | | 515(71.8) | | 107(63.7) | | 9(47.4) | |
| III (n, %) | 68(17.9) | | 129(18.0) | | 64(26.0) | 7(33.3) | 62(18.3) | 132(17.9) | | 67(25.1) | 7(35.0) | 89(19.4) | | 128(17.9) | | 44(26.2) | | 7(36.8) | |
| IV (n, %) | 3(0.8) | | 13(1.8) | | 4(1.6) | 3(14.3) | 1(0.3) | 16(2.2) | | 3(1.1) | 3(15.0) | 5(1.1) | | 13(1.8) | | 2(1.2) | | 3(15.8) | |
| LVEF (%) | 63.10(60.63;65.90) | | 63.30(60.30;65.80) | | 63.05(59.53;65.73) | 63.00(59.85;66.65) | 63.05(60.18;65.80) | 63.30(60.70;65.90) | | 63.10(59.00;65.70) | 63.70(59.85;66.78) | 63.30(60.68;65.80) | | 63.10(60.00;65.90) | | 63.25(59.20;65.60) | | 64.40(59.80;66.90) | |
| STS Score | 0.49(0.34;0.78) | | 0.78(0.51;1.15) | | 1.32(0.86;1.93) | 1.98(0.90;3.08) | 0.58(0.37;0.92) | 0.74(0.46;1.15) | | 1.18(0/73;1.63) | 1.86(0.84;2.87) | 0.67(0.41;1.02) | | 0.75(0.47;1.18) | | 1.20(0.73;1.70) | | 1.88(0.78(2.95) | |
| Euro Score | 0.98(0.76;1.39) | | 1.43(1.07;1.97) | | 2.33(1.74;3.37) | 4.02(2.60;5.09) | 1.10(0.81;1.56) | 1.41(0.97;1.98) | | 2.03(1.43(2.93) | 3.83(2.52;5.02) | 1.22(0.86;1.83) | | 1.43(0.98;2.02) | | 2.11(1.41;3.06) | | 4.02(2.45;5.07) | |
| Bypass graft number (n) | 4(3;4) | | 4(3;4) | | 3(3;4) | 3(3;4) | 4(3;4) | 4(3;4) | | 3(3;4) | 3(3;4) | 4(3;4) | | 4(3;4) | | 3(3;4) | | 3(3;4) | |
| In-hospital mortality (n, %) | 0(0.0)) | | 13(1.8) | | 12(4.9) | 3(14.3) | 0(0.0) | 14(1.9) | | 12(4.5) | 2(10.0) | 2(0.4) | | 13(1.8) | | 11(6.5) | | 2(10.5) | |
| Postoperative AKI (n) |  | | | | | | | | | | | | | | | | | | |
| Stage 1 (n, %) | 51(13.4) | | 139(19.4) | | 80(32.5) | 9(42.9) | 42(12.4) | 144(19.5) | | 84(31.5) | 9(45.0) | 60(13.1) | | 152(21.2) | | 58(34.5) | | 9(47.4) | |
| Stage 2 (n, %) | 3(0.8) | | 9(1.3) | | 7(2.8) | 0(0.0) | 5(1.5) | 9(1.2) | | 5(1.9) | 0(0.0) | 6(1.3) | | 8(1.1) | | 5(3.0) | | 0(0.0) | |
| Stage 3 (n, %) | 3(0.8) | | 8(1.1) | | 5(2.0) | 5(23.8) | 3(0.9) | 7(0.9) | | 7(2.6) | 4(20.0) | 5(1.1) | | 6(0.8) | | 6(3.6) | | 4(21.1) | |
| Long-term mortality (n, %) | 8(2.1) | | 49(7.0) | | 45(19.2) | 7(38.9) | 10(3.0) | 51(7.1) | | 40(15.7) | 8(44.4) | 19(4.2) | | 57(8.1) | | 26(16.6) | | 7(41.2) | |

Supplementary Table 1: Demographics and clinical characteristics of subgroups classified by three equations.

# Abbreviation: BMI, body mass index; BSA, body surface area; Scr, serum creatinine; eGFR, Estimated Glomerular Filtration Rate; COPD, chronic obstructive pulmonary disease; PCI, percutaneous coronary intervention; CAD, coronary artery disease; MI, myocardial infarction; NYHA, New York Heart Association; LVEF, left ventricular ejection fraction; STS, Society of Thoracic Surgeons; AKI, acute kidney injury.

# Supplementary Table 2

Demographics and clinical characteristics of followed-up cohort.

| Variables | Death(n=109) | Survival(n=1225) | P-value |
| --- | --- | --- | --- |
| Age(y) | 71.61(67;77) | 64.4(59;70.5) | <0.001 |
| Female (n,%) | 27(24.8) | 266(21.7) | 0.460 |
| Weight (kg) | 66.49(60;73) | 69.86(62;77) | 0.002 |
| Height (cm) | 165.65(160.5;170.5) | 166.45(161;172) | 0.290 |
| BMI (kg/m2) | 24.2(22.11;26.12) | 25.17(23.11;26.99) | 0.003 |
| BSA (m2) | 1.73(1.65;1.84) | 1.78(1.67;1.89) | 0.006 |
| Smoking(n,%) | 37(33.9) | 473(38.6) | 0.337 |
| Diabetes (n,%) | 43(39.4) | 387(31.6) | 0.093 |
| Hypertention (n,%) | 85(78) | 853(69.6) | 0.068 |
| Hyperlipemia (n,%) | 8(7.3) | 72(5.9) | 0.538 |
| Preoperative Scr(μmol/l) | 102.13(70.5;106.95) | 80.89(65.3;89.6) | <0.001 |
| Postoperative Scr(μmol/l) | 112.05(80.45;128.75) | 89.43(69.9;101.6) | <0.001 |
| Preoperative eGFRCG (mL/min/1.73 m2) | 60.71(49.11;73.39) | 80.81(65.72;94.35) | <0.001 |
| Preoperative eGFR FAS (mL/min/1.73 m2) | 62.79(50.22;76.39) | 78.91(64.68;91.62) | <0.001 |
| Preoperative eGFRCKD-EFI (mL/min/1.73 m2) | 68.87(54.39;87.49) | 82.42(72.51;95.17) | <0.001 |
| Postoperative eGFR CG (mL/min/1.73 m2) | 53.93(42.52;64.49) | 74.57(58.19;89.9) | <0.001 |
| Postoperative eGFRFAS (mL/min/1.73 m2) | 56.05(42.14;69.07) | 72.86(57.02;86.75) | <0.001 |
| Postoperative eGFRCKD-EFI (mL/min/1.73 m2) | 61.18(44.88;78.89) | 76.09(61.37;91.43) | <0.001 |
| Cerebrovascular disease |  |  | <0.001 |
| Lacunar infarction (n, %) | 35(32.1) | 167(13.6) |  |
| Cerebral infarction (n, %) | 8(7.3) | 55(4.5) |  |
| COPD (n, %) | 2(1.8) | 23(1.9) | 0.975 |
| Peripheral vascular disease (n,%) | 1(0.9) | 23(1.9) | 0.729 |
| Previous PCI (n,%) | 3(2.8) | 43(3.5) | 0.887 |
| Atrial flutter and fibrillation (n, %) | 2(1.8) | 27(2.2) | 0.800 |
| Pulmonary hypertension |  |  | 0.750 |
| Moderate (n, %) | 7(6.4) | 102(8.3) |  |
| Severe (n, %) | 0(0) | 1(0.1) |  |
| Types of CAD |  |  | 0.946 |
| MI (n, %) | 11(10.1) | 131(10.7) |  |
| Unstable angina (n, %) | 69(63.3) | 756(61.7) |  |
| Number of diseased vessels (n) | 2.81(3;3) | 2.84(3;3) | 0.359 |
| NYHA |  |  | 0.001 |
| I (n, %) | 6(5.5) | 128(10.4) |  |
| II (n, %) | 72(66.1) | 851(69.5) |  |
| III (n, %) | 25(22.9) | 233(19.0) |  |
| IV (n, %) | 6(5.5) | 13(1.1) |  |
| LVEF (%) | 61.14(59.9;65.5) | 61.56(60.1;65.9) | 0.491 |
| STS Score | 1.45(0.96;1.83) | 0.93(0.44;1.12) | <0.001 |
| Euro Score | 2.64(1.75;3.41) | 1.62(0.95;1.96) | <0.001 |
| Bypass graft number (n) | 3.36(3;4) | 3.57(3;4) | 0.006 |
| Postoperative AKI |  |  | <0.001 |
| Stage 1(n, %) | 36(33) | 235(19.2) |  |
| Stage 2(n, %) | 4(3.7) | 12(1) |  |
| Stage 3(n, %) | 4(3.7) | 8(0.7) |  |

# Abbreviation: BMI, body mass index; BSA, body surface area; Scr, serum creatinine; eGFR, Estimated Glomerular Filtration Rate; COPD, chronic obstructive pulmonary disease; PCI, percutaneous coronary intervention; CAD, coronary artery disease; MI, myocardial infarction; NYHA, New York Heart Association; LVEF, left ventricular ejection fraction; STS, Society of Thoracic Surgeons; AKI, acute kidney injury.
